# Supplementary material for: Li–fluorine codoped electrospun carbon nanofibers for enhanced hydrogen storage
Source: Royal Society of Chemistry journal article supplement (doi:10.1039/d0ra06500e), 2021-01-01
Supplement: d0ra06500e1.pdf [file d0ra06500e1.pdf]

## Supporting Information

### **Li-fluorine-codoped electrospun carbon nanofibers for enhanced hydrogen storage**

Xiaohong Chen,<sup>a</sup> Zhiyong Xue,<sup>a</sup> Kai Niu,<sup>b</sup> Xundao Liu,<sup>c</sup> Wei Lv,<sup>a</sup> Bao Zhang,<sup>a</sup>

Zhongyu Li,<sup>a</sup> Hong Zeng,<sup>a</sup> Yu Ren,<sup>a</sup> Ying Wu,<sup>\*a</sup> and Yongming Zhang<sup>\*b</sup>

<sup>a</sup>Institute of Advanced Materials, North China Electric Power University, Beijing

<sup>b</sup>School of Chemistry and Chemical Engineering, Shanghai Jiao Tong University, No. 800

Dongchuan Rd., Minhang District, Shanghai 200240, China. E-mail: ymzsztu@gmail.com,

<sup>c</sup>School of Materials Science and Engineering, University of Jinan, Jinan, 250022 China.

E-mail: yingwu2000@hotmail.com; ymzsztu@gmail.com

### **Contents**

**Fig. S1.** XRD patterns of (a) 0.01F-PCNFs, (b) 0.05F-PCNFs, (c) 0.01Li-F-PCNFs and (d) 0.05Li-F-PCNFs composites

**Fig. S2.** SEM images of (a) PAN/PVP and (b) PAN/PVP/0.1PFSA.

**Fig. S3.** SEM images of PAN/PVP/0.01PFSA.

**Fig. S4.** SEM images of porous PAN/0.01PFSA.

**Fig. S5.** SEM images of 0.01F-PCNFs.

**Fig. S6.** SEM images of PAN/PVP/0.05PFSA.

**Fig. S7.** SEM images of porous PAN/0.05PFSA.

**Fig. S8.** SEM images of 0.05F-PCNFs.

**Fig. S9.** SEM images of porous PAN/0.01PFSA-Li.

**Fig. S10.** SEM images of 0.01Li-F-PCNFs composites.

**Fig. S11.** SEM images of porous PAN/0.05PFSA-Li.

**Fig. S12.** SEM images of 0.05Li-F-PCNFs composites.

**Fig. S13.** (a, b) HRTEM images and (c) EDS of 0.1Li-F-PCNFs composites.

**Fig. S14.** Nitrogen adsorption–desorption isotherms of 0.1Li-F-PCNFs composites  
obtained at 77 K.

**Fig. S15.** Raman spectra of (a) 0.01F-PCNFs composites, (b) 0.05F-PCNFs  
composites, and (c) 0.1F-PCNFs composites.

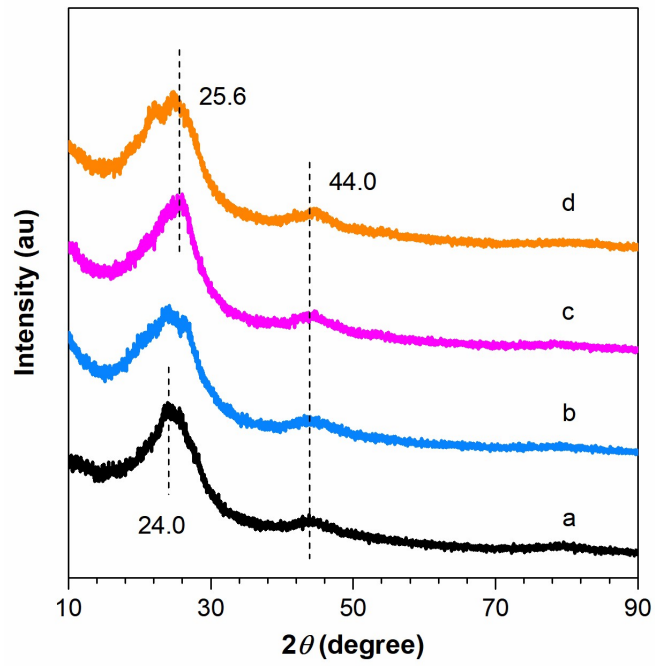

**Fig. S1.** XRD patterns of (a) 0.01F-PCNFs, (b) 0.05F-PCNFs, (c) 0.01Li-F-PCNFs and (d) 0.05Li-F-PCNFs composites

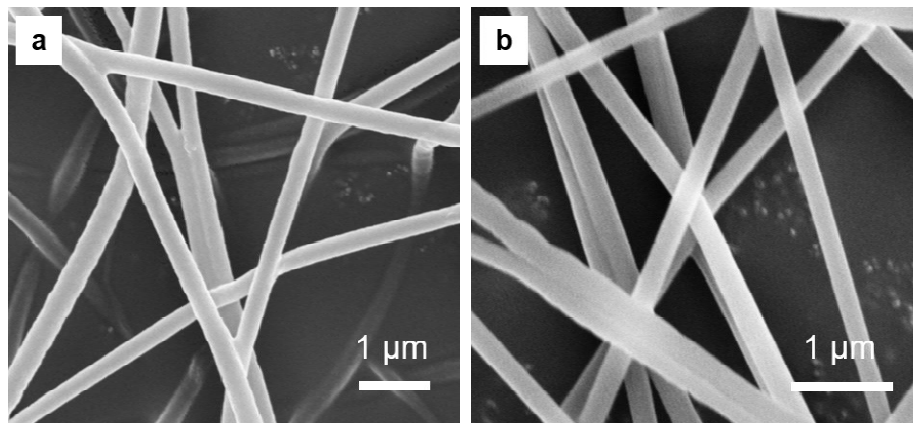

**Fig. S2.** SEM images of (a) PAN/PVP and (b) PAN/PVP/0.1PFSA.

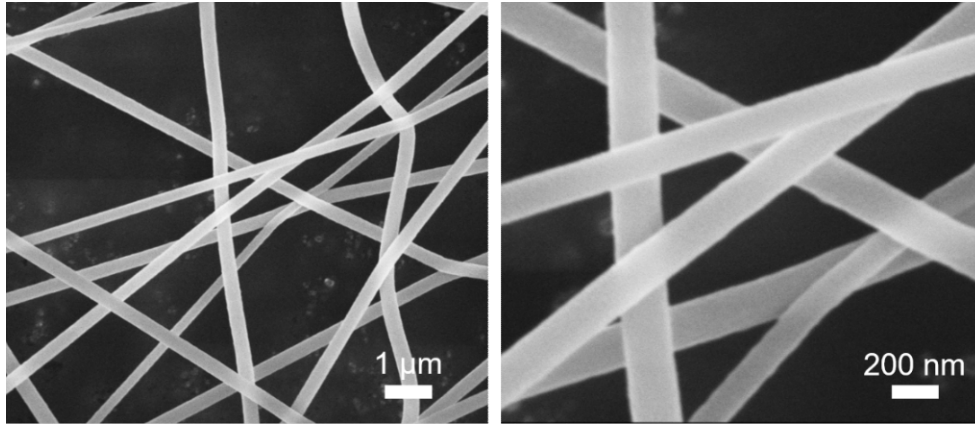

**Fig. S3.** SEM images of PAN/PVP/0.01PFSA.

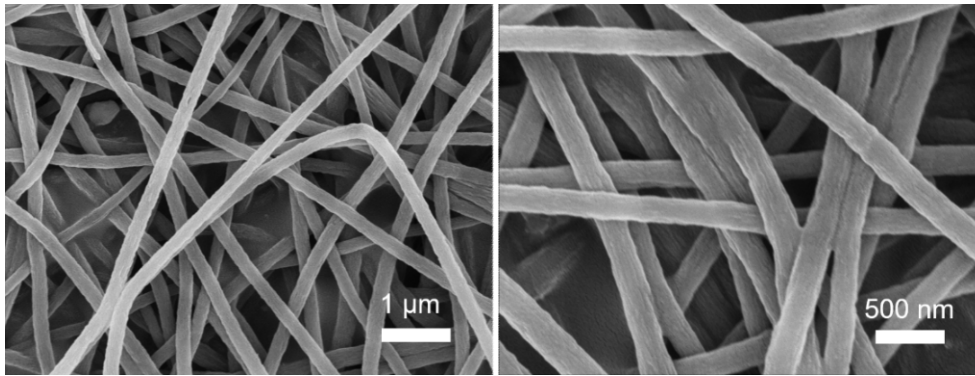

**Fig. S4.** SEM images of porous PAN/0.01PFSA.

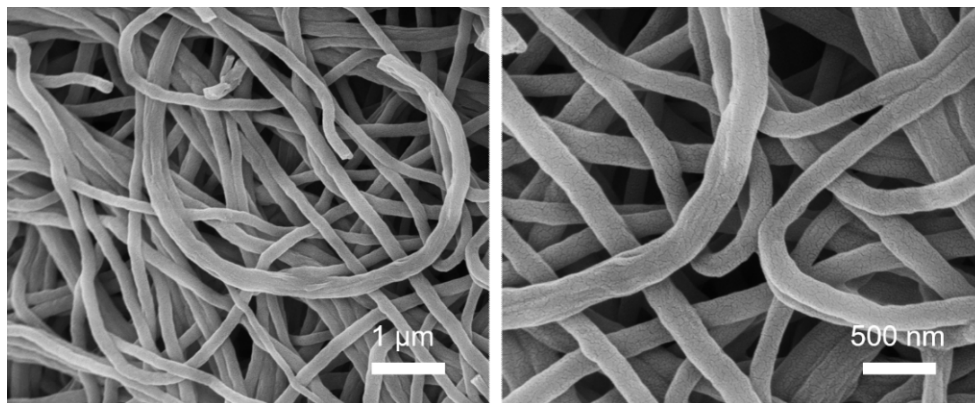

**Fig. S5.** SEM images of 0.01F-PCNFs.

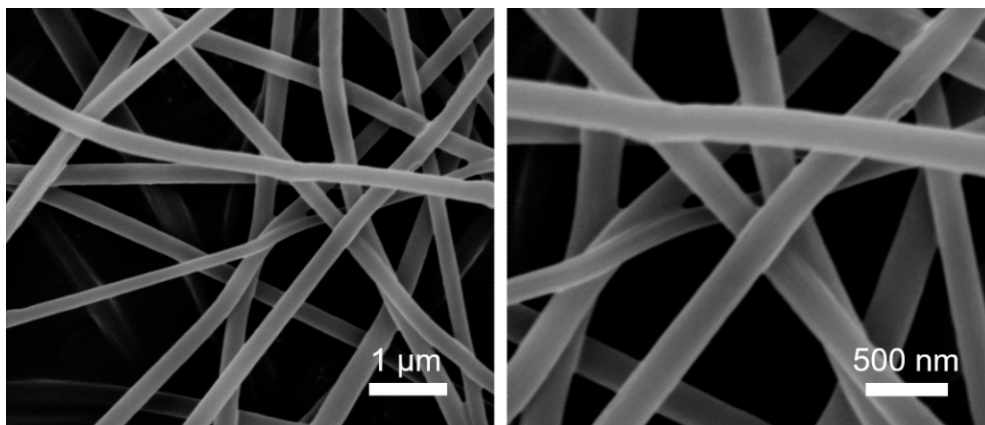

**Fig. S6.** SEM images of PAN/PVP/0.05PFSA.

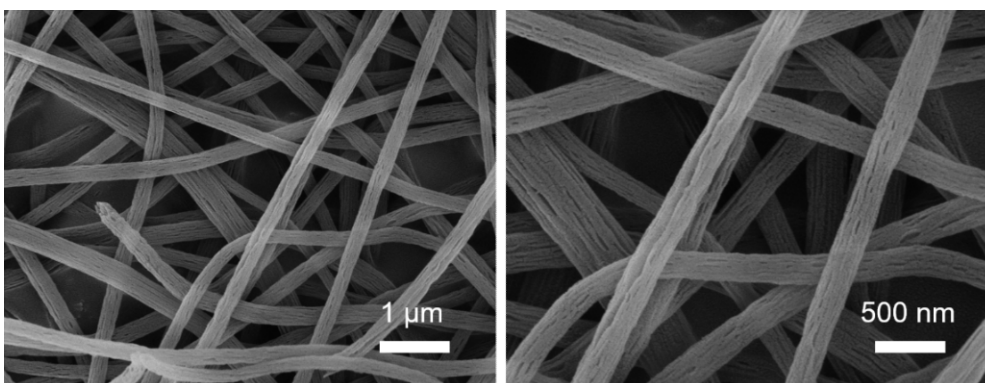

**Fig. S7.** SEM images of porous PAN/0.05PFSA.

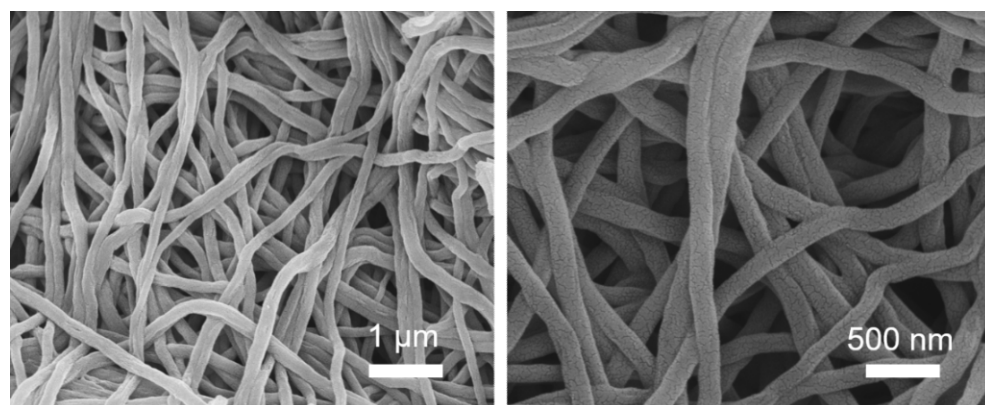

**Fig. S8.** SEM images of 0.05F-PCNFs.

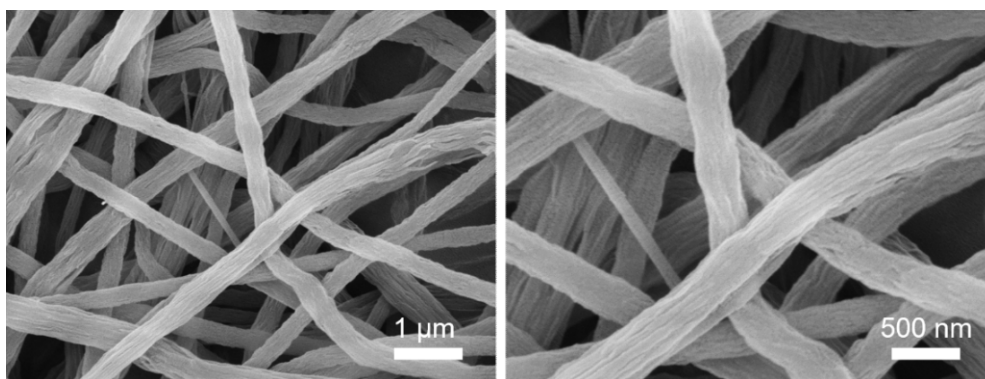

**Fig. S9.** SEM images of porous PAN/0.01PFSA-Li.

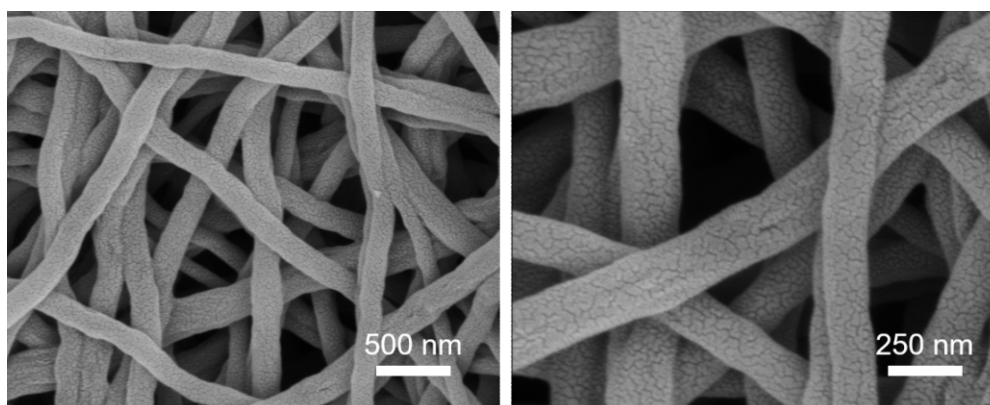

**Fig. S10.** SEM images of 0.01Li-F-PCNFs composites.

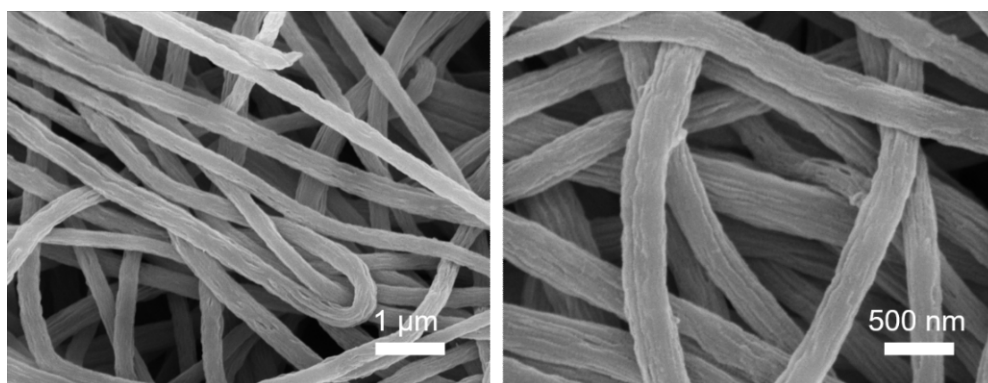

**Fig. S11.** SEM images of porous PAN/0.05PFSA-Li.

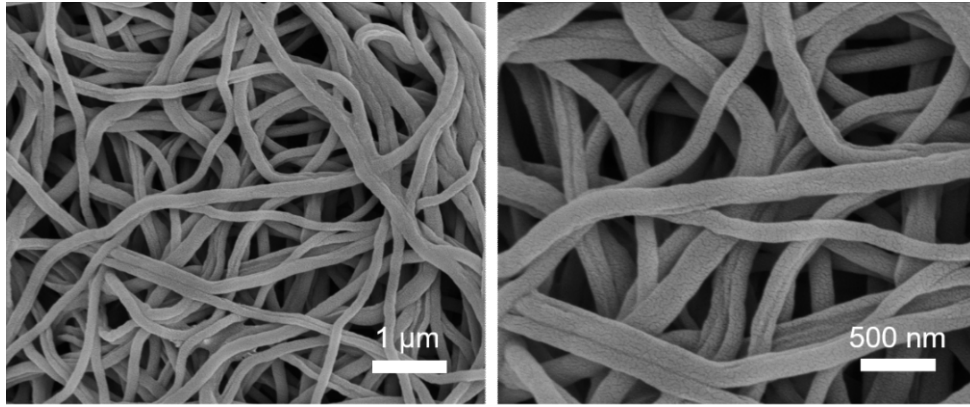

**Fig. S12.** SEM images of 0.05Li-F-PCNFs composites.

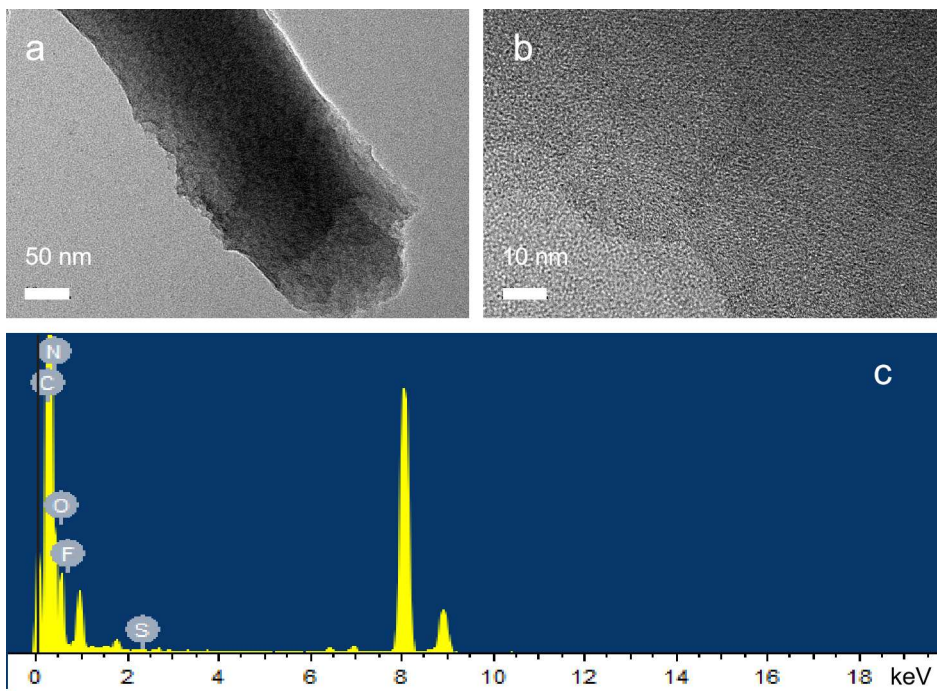

**Fig. S13.** (a, b) HRTEM images and (c) EDS of 0.1Li-F-PCNFs composites.

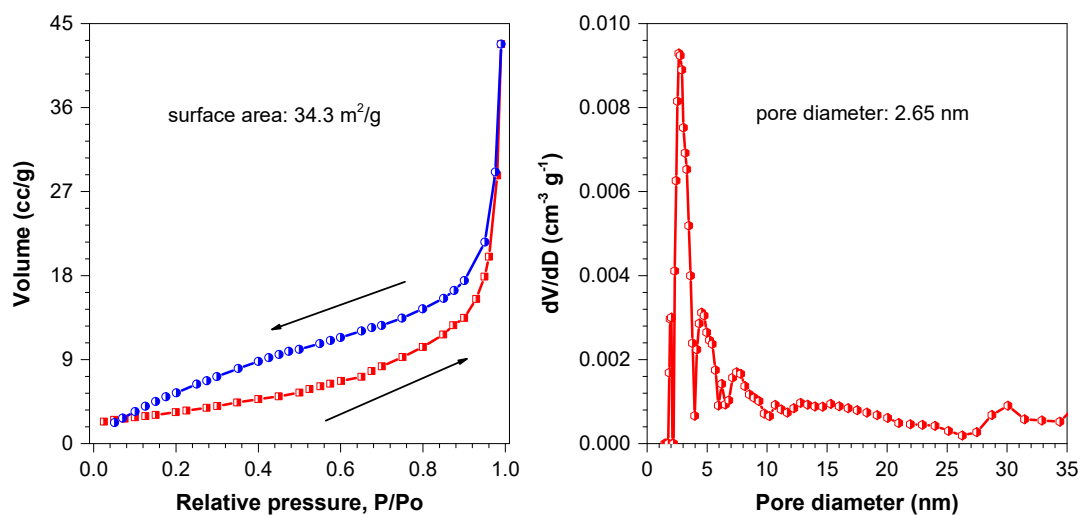

**Fig. S14.** Nitrogen adsorption–desorption isotherms of 0.1Li-F-PCNFs composites obtained at 77 K.

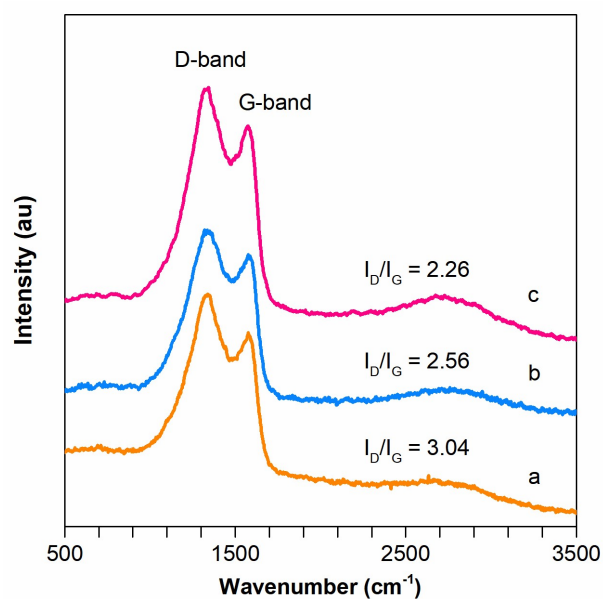

**Fig. S15.** Raman spectra of (a) 0.01F-PCNFs composites, (b) 0.05F-PCNFs composites, and (c) 0.1F-PCNFs composites.
